# Supplementary material for: The variations in volatile organic compounds based on the policy change for Omicron in the traffic hub of Zhengzhou
Source: Copernicus journal article supplement (doi:10.5194/acp-24-13587-2024), 2024-12-10
Supplement: Supplementary file 1 [file acp-24-13587-2024-supplement.pdf]

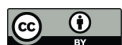

*Supplement of*

## **The variations in volatile organic compounds based on the policy change for Omicron in the traffic hub of Zhengzhou**

**Bowen Zhang et al.**

*Correspondence to:* Xiao Li (lixiao9060@zzu.edu.cn)

The copyright of individual parts of the supplement might differ from the article licence.

- 1 **Fig. S1. Trend of Omicron infection in China from 9 Dec. 2022 to 1 Jan. 2023.**
- 2 **Fig. S2. (a) the  $Q_{\text{true}}/Q_{\text{expected}}$  ratio for different  $F_{\text{peak}}$  value solutions; (b) The**
- 3  **$Q_{\text{true}}/Q_{\text{expected}}$  ratios in different solutions.**
- 4 **Fig. S3. Relative humidity and (a)  $\text{PM}_{2.5}$ , (b)  $\text{NO}_x$ , (c) TVOCs correlation.**
- 5 **Fig. S4. Potential source areas for VOCs (a) Infection period (b) Recovery period (Black**
- 6 **pentagrams represent sampling locations).**
- 7 **Fig. S5. Characteristics of daily changes in different sources obtained using the PMF**
- 8 **model.**
- 9 **Fig. S6. Infection period, recovery period, high pollution events, and clean days PMF**
- 10 **source analysis.**
- 11 **Table S1. Specific VOCs concentrations and ratios.**
- 12 **Table S2. Concentrations of important tracer substances in different processes (ppbv)**
- 13 **(observations in parentheses, red text indicates the corresponding source concentration of**
- 14 **the substance).**
- 15 **Table S3. Top 10 VOC species of SOAFP in Case 1.**
- 16 **Table S4. Top 10 VOC species of SOAFP in Case 2.**
- 17
- 18

19

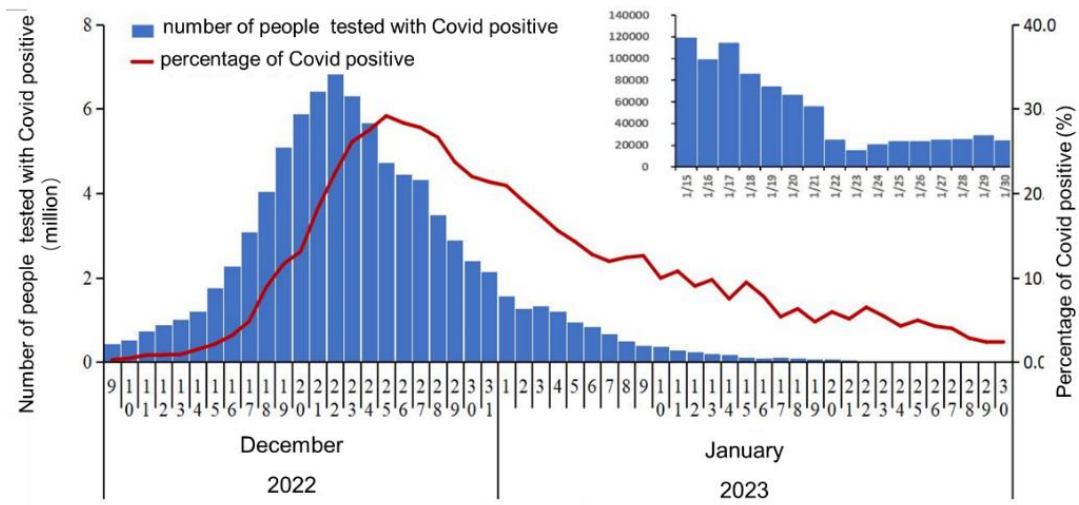

20

21

**Fig. S1. Trend of Omicron infection in China from 9 Dec. 2022 to 1 Jan. 2023 (CCDCP, 2023)**

22

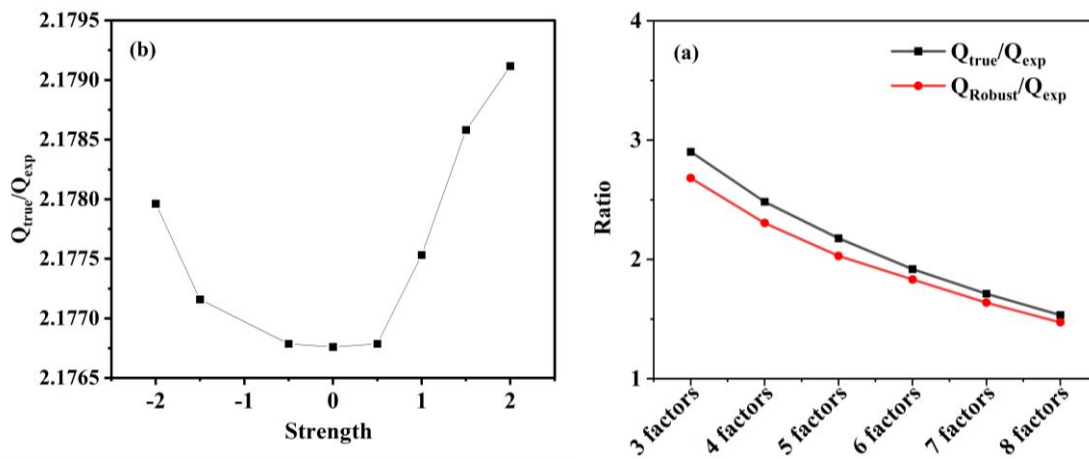

23

24

25

**Fig. S2. (a) the  $Q_{true}/Q_{expected}$  ratio for different  $F_{peak}$  value solutions; (b) The  $Q_{true}/Q_{expected}$  ratios in different solutions.**

26

27

28

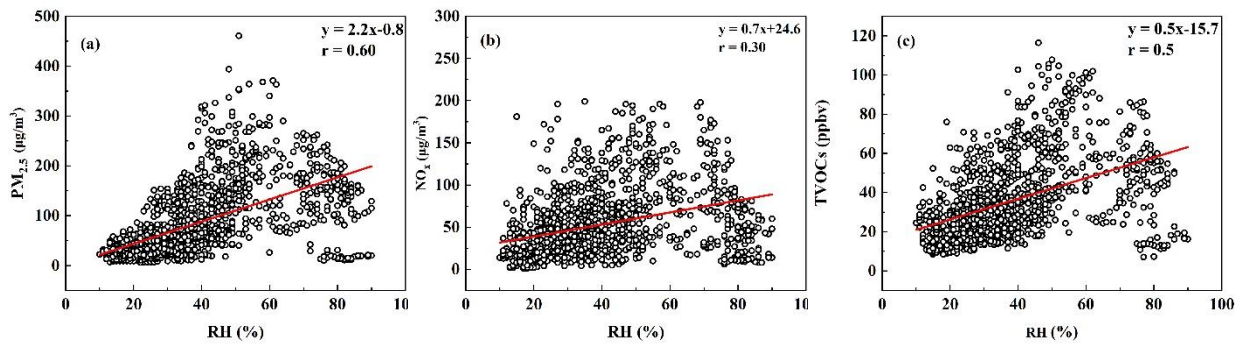

30 **Fig. S3. Relative humidity and (a) PM<sub>2.5</sub>, (b) NO<sub>x</sub>, (c) TVOCs correlation.**

31

32

33

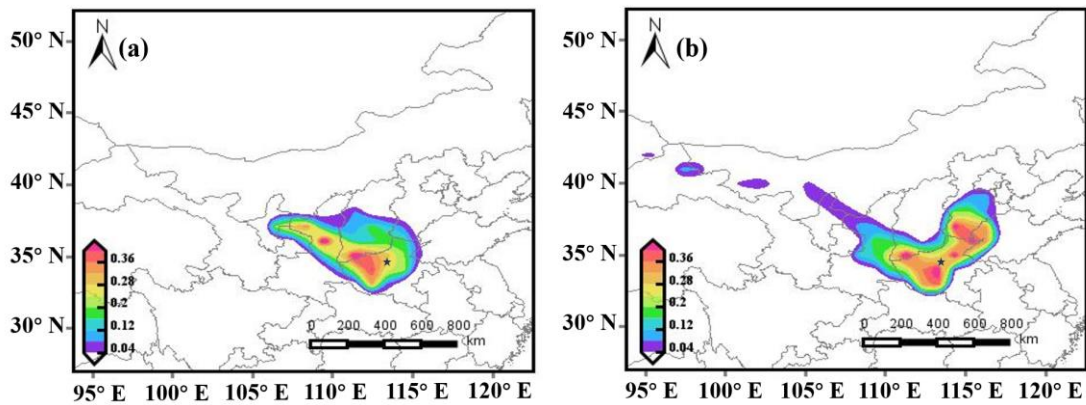

34

35 **Fig. S4. Potential source areas for VOCs (a) Infection period (b) Recovery period**  
 36 **(Black pentagrams represent sampling locations).**

37

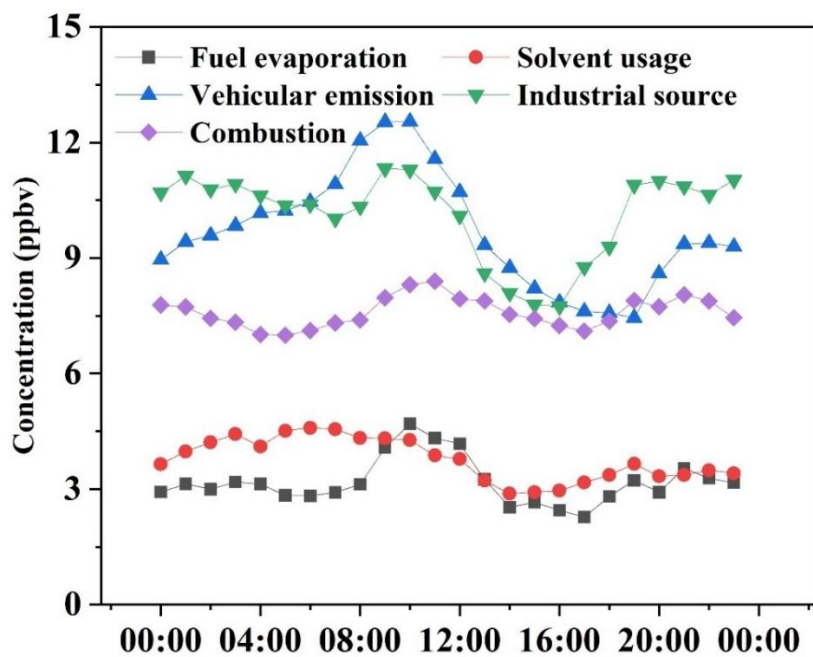

38

39Fig. S5. Characteristics of daily changes in different sources obtained using the PMF  
40 model.

41

42

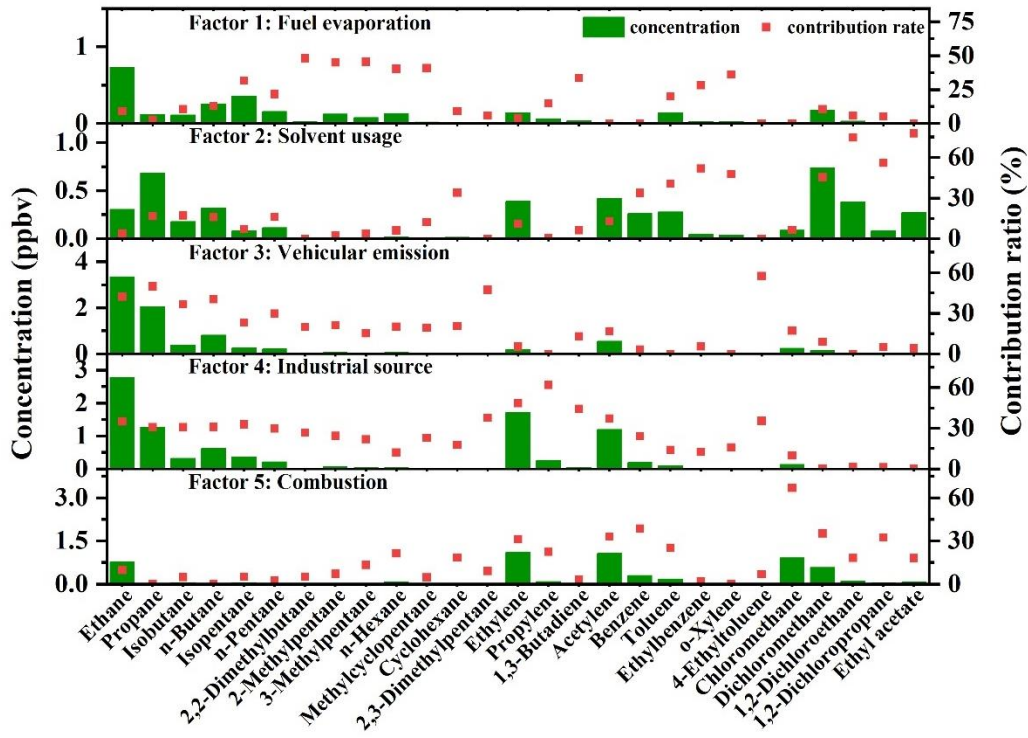

recovery period

43

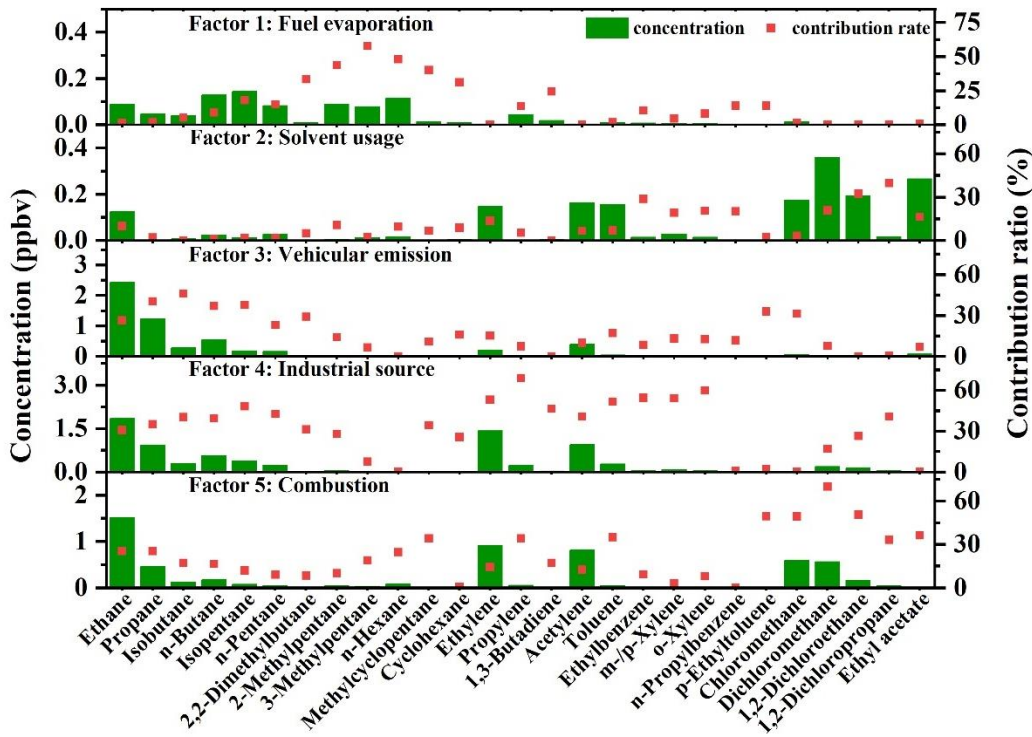

infection period

44

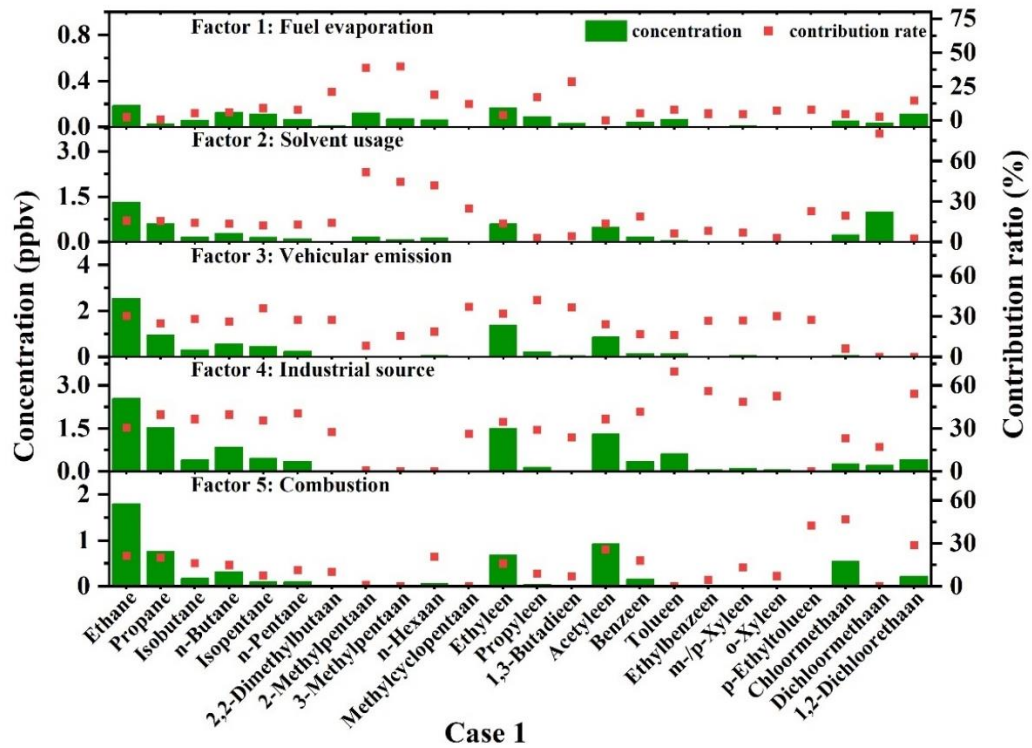

45

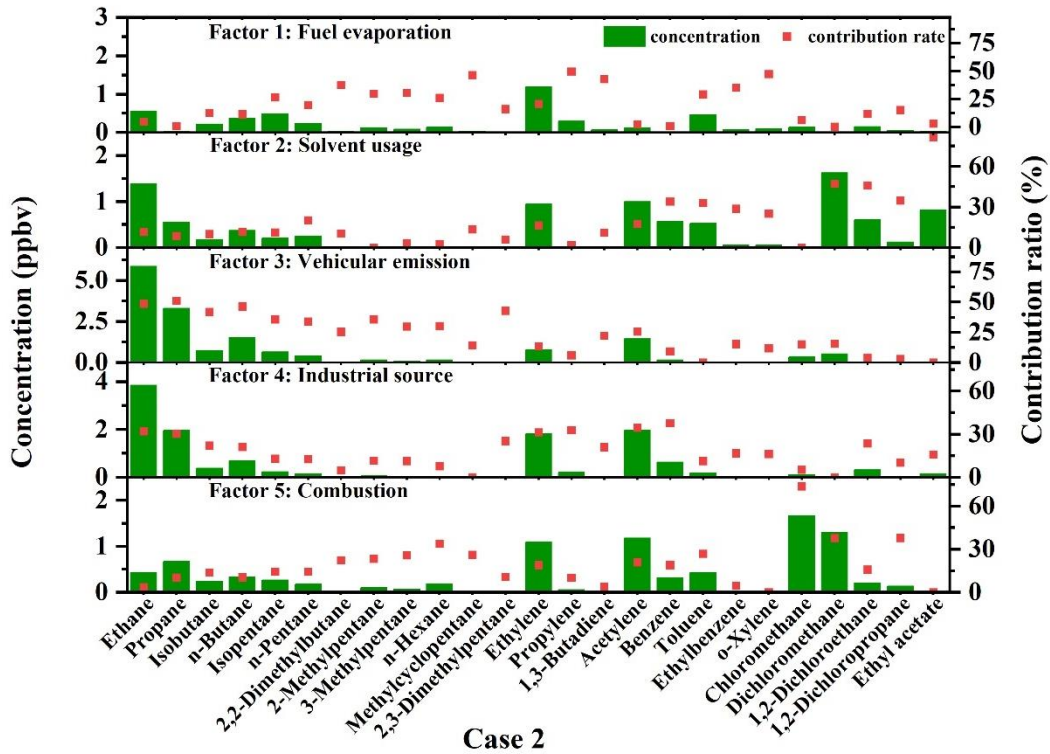

46



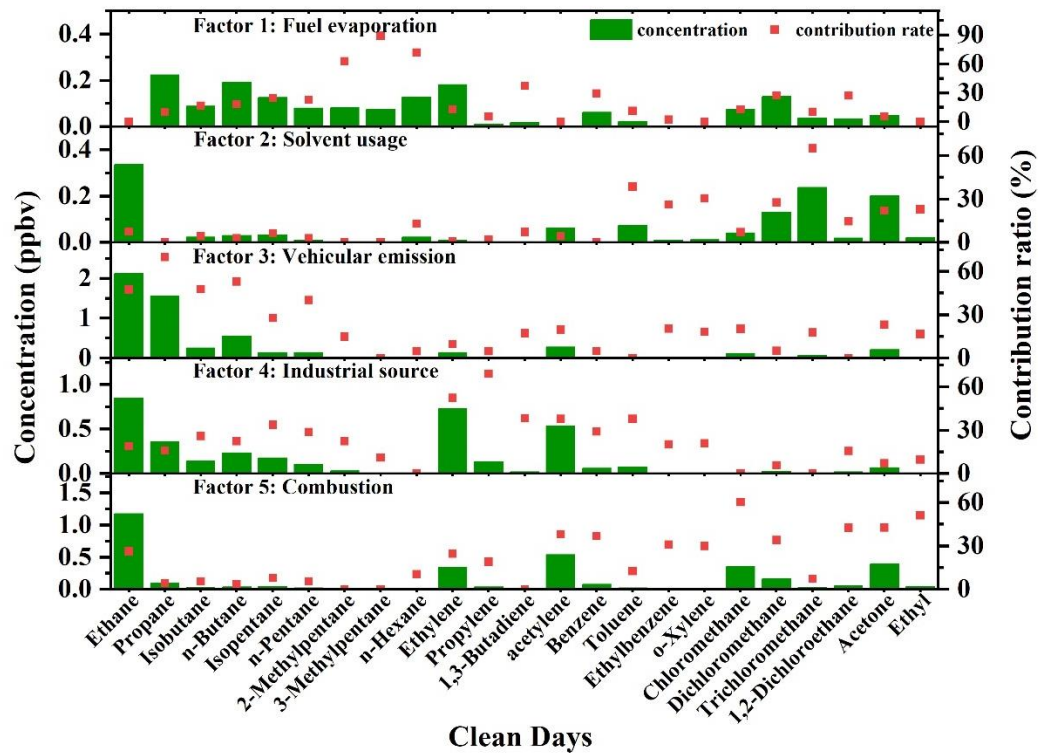

47

48Fig. S6. Infection period, recovery period, high pollution events, and clean days PMF  
 49 source analysis.

50

51



**Table S1. Specific VOCs concentrations and ratios.**

| <b>species</b> | <b>Concentration (ppbv)</b> | <b>Ratio</b>                         |
|----------------|-----------------------------|--------------------------------------|
| toluene        | 0.7                         | toluene/benzene = <b>1.0</b>         |
| benzene        | 0.7                         |                                      |
| isopentane     | 1.0                         | isopentane/n-pentane = <b>1.4</b>    |
| n-pentane      | 0.7                         |                                      |
| isobutane      | 0.9                         | Isobutane/n-butane = <b>0.5</b>      |
| n-butane       | 1.8                         |                                      |
| m/p-xylene     | 0.2                         | m/p-xylene/ethylbenzene = <b>2.0</b> |
| ethylbenzene   | 0.1                         |                                      |

53

**Table S2. Concentrations of important tracer substances in different processes (ppbv) (observations in parentheses).**

54

|                                             | ethane                       |                              |                              |                               |                                |                              | 2-Methylpentane              |                              |                              |                              |                              |                              |
|---------------------------------------------|------------------------------|------------------------------|------------------------------|-------------------------------|--------------------------------|------------------------------|------------------------------|------------------------------|------------------------------|------------------------------|------------------------------|------------------------------|
| Source                                      | Infection                    | Recovery                     | Entire                       | Case 1                        | Case 2                         | Clean days                   | Infection                    | Recovery                     | Entire                       | Case 1                       | Case 2                       | Clean days                   |
| <b>Factor 1</b><br><b>Fuel evaporation</b>  | 0.09                         | 0.73                         | 0.41                         | 0.19                          | 0.55                           | 0                            | <b>0.09</b>                  | <b>0.12</b>                  | <b>0.10</b>                  | <b>0.12</b>                  | <b>0.13</b>                  | <b>0.08</b>                  |
| <b>Factor 2</b><br><b>Solvent usage</b>     | 0.14                         | 0.30                         | 0                            | 1.32                          | 1.38                           | 0.34                         | 0.01                         | 0.01                         | 0.01                         | 0.16                         | 0                            | 0                            |
| <b>Factor 3</b><br><b>Vehicle emission</b>  | <b>2.39</b>                  | <b>3.35</b>                  | <b>2.91</b>                  | <b>2.55</b>                   | <b>5.85</b>                    | <b>2.12</b>                  | 0.02                         | 0.06                         | 0.06                         | 0.03                         | 0.16                         | 0.02                         |
| <b>Factor 4</b><br><b>Industrial source</b> | 1.83                         | 2.77                         | 2.5                          | 2.54                          | 3.84                           | 0.85                         | 0.06                         | 0.07                         | 0.07                         | 0.01                         | 0.05                         | 0.03                         |
| <b>Factor 5</b><br><b>Combustion</b>        | 1.55                         | 0.76                         | 1.36                         | 1.80                          | 0.43                           | 1.17                         | 0.04                         | 0.02                         | 0                            | 0                            | 0.10                         | 0                            |
| <b>sum</b>                                  | <b>6.00</b><br><b>(6.80)</b> | <b>7.91</b><br><b>(7.81)</b> | <b>7.18</b><br><b>(6.80)</b> | <b>8.40</b><br><b>(10.06)</b> | <b>12.05</b><br><b>(12.17)</b> | <b>4.48</b><br><b>(4.30)</b> | <b>0.22</b><br><b>(0.25)</b> | <b>0.28</b><br><b>(0.26)</b> | <b>0.24</b><br><b>(0.24)</b> | <b>0.32</b><br><b>(0.37)</b> | <b>0.44</b><br><b>(0.45)</b> | <b>0.13</b><br><b>(0.14)</b> |
|                                             | benzene                      |                              |                              |                               |                                |                              | methyl chloride              |                              |                              |                              |                              |                              |
| <b>Factor 1</b><br><b>Fuel evaporation</b>  | 0.02                         | 0                            | 0.06                         | 0.04                          | 0.01                           | 0.06                         | 0.02                         | 0                            | 0.08                         | 0.05                         | 0.14                         | 0.07                         |
| <b>Factor 2</b><br><b>Solvent usage</b>     | 0.13                         | 0.26                         | 0.16                         | 0.17                          | 0.57                           | 0                            | 0.18                         | 0.09                         | 0                            | 0.23                         | 0                            | 0.04                         |
| <b>Factor 3</b><br><b>Vehicle emission</b>  | 0.01                         | 0.03                         | 0.07                         | 0.15                          | 0.15                           | 0.01                         | 0.06                         | 0.23                         | 0.06                         | 0.07                         | 0.34                         | 0.12                         |

|                                       |                              |                              |                              |                              |                              |                              |                              |                              |                              |                              |                              |                              |  |
|---------------------------------------|------------------------------|------------------------------|------------------------------|------------------------------|------------------------------|------------------------------|------------------------------|------------------------------|------------------------------|------------------------------|------------------------------|------------------------------|--|
| <b>Factor 4<br/>Industrial source</b> | <b>0.16</b>                  | <b>0.19</b>                  | <b>0.09</b>                  | <b>0.36</b>                  | <b>0.63</b>                  | <b>0.06</b>                  | 0                            | 0.13                         | 0.30                         | 0.27                         | 0.11                         | 0                            |  |
| <b>Factor 5<br/>Combustion</b>        | 0.24                         | 0.3                          | 0.33                         | 0.16                         | 0.31                         | 0.08                         | <b>0.58</b>                  | <b>0.91</b>                  | <b>0.72</b>                  | <b>0.55</b>                  | <b>1.67</b>                  | <b>0.35</b>                  |  |
| <b>sum</b>                            | <b>0.56</b><br><b>(0.65)</b> | <b>0.78</b><br><b>(0.83)</b> | <b>0.71</b><br><b>(0.69)</b> | <b>0.88</b><br><b>(1.10)</b> | <b>1.67</b><br><b>(1.74)</b> | <b>0.21</b><br><b>(0.20)</b> | <b>0.84</b><br><b>(0.99)</b> | <b>1.36</b><br><b>(1.43)</b> | <b>1.16</b><br><b>(1.14)</b> | <b>1.17</b><br><b>(1.37)</b> | <b>2.26</b><br><b>(2.35)</b> | <b>0.58</b><br><b>(0.54)</b> |  |
|                                       | <b>ethyl acetate</b>         |                              |                              |                              |                              |                              |                              |                              |                              |                              |                              |                              |  |
| <b>Factor 1<br/>Fuel evaporation</b>  | 0                            | 0                            | 0.01                         | 0.02                         | 0.03                         | 0                            |                              |                              |                              |                              |                              |                              |  |
| <b>Factor 2<br/>Solvent usage</b>     | <b>0.27</b>                  | <b>0.27</b>                  | <b>0.72</b>                  | <b>0.63</b>                  | <b>0.80</b>                  | <b>0.02</b>                  |                              |                              |                              |                              |                              |                              |  |
| <b>Factor 3<br/>Vehicle emission</b>  | 0.08                         | 0.01                         | 0.03                         | 0.01                         | 0                            | 0.01                         |                              |                              |                              |                              |                              |                              |  |
| <b>Factor 4<br/>Industrial source</b> | 0                            | 0                            | 0.02                         | 0.08                         | 0.16                         | 0.01                         |                              |                              |                              |                              |                              |                              |  |
| <b>Factor 5<br/>Combustion</b>        | 0                            | 0.06                         | 0.01                         | 0.01                         | 0                            | 0.04                         |                              |                              |                              |                              |                              |                              |  |
| <b>sum</b>                            | <b>0.35</b><br><b>(0.45)</b> | <b>0.34</b><br><b>(0.40)</b> | <b>0.79</b><br><b>(0.68)</b> | <b>0.75</b><br><b>(0.81)</b> | <b>0.99</b><br><b>(1.09)</b> | <b>0.08</b><br><b>(0.06)</b> |                              |                              |                              |                              |                              |                              |  |

56  
57

**Table S3. Top 10 VOC species of SOAP in Case 1.**

| Material                    | SOAP/ $\mu\text{g}/\text{m}^3$ | percentage of measured VOCs /% |
|-----------------------------|--------------------------------|--------------------------------|
| toluene                     | 34.6                           | 51.7                           |
| m/p-Xylene                  | 9.8                            | 14.6                           |
| benzene                     | 8.5                            | 12.7                           |
| o-xylene                    | 4.3                            | 6.4                            |
| ethylbenzene                | 4.3                            | 6.4                            |
| m-Ethyltoluene              | 1.4                            | 2.1                            |
| 1,2,4-Trimethylbenzene      | 1.1                            | 1.6                            |
| 1,3,5-Trimethylbenzene      | 0.7                            | 1.0                            |
| o-Ethyltoluene              | 0.5                            | 0.7                            |
| 1,2,3-Trimethylbenzene      | 0.5                            | 0.7                            |
| The total of top 10 species | 65.7                           | 97.9                           |

58  
59  
60

**Table S4. Top 10 VOC specie of SOAP in Case 2.**

| Material                    | SOAP/ $\mu\text{g}/\text{m}^3$ | percentage of measured VOCs /% |
|-----------------------------|--------------------------------|--------------------------------|
| toluene                     | 49.4                           | 45.2                           |
| m/p-Xylene                  | 19.4                           | 17.8                           |
| benzene                     | 13.4                           | 12.3                           |
| ethylbenzene                | 7.5                            | 6.9                            |
| o-xylene                    | 7.5                            | 6.9                            |
| 1,3,5-Trimethylbenzene      | 2.2                            | 2.0                            |
| m-Ethyltoluene              | 1.9                            | 1.7                            |
| 1,2,4-Trimethylbenzene      | 1.5                            | 1.4                            |
| o-Ethyltoluene              | 1.2                            | 1.1                            |
| 1,2,3-Trimethylbenzene      | 1.1                            | 1.0                            |
| The total of top 10 species | 105.1                          | 96.3                           |

61  
62  
63  
64  
65  
66  
67

**Reference**

CCDCP, Chinese Center for Disease Control and Prevention  
[https://www.chinacdc.cn/jkzt/crb/zl/szkb\\_11803/jszl\\_13141/202302/t20230201\\_263576.html](https://www.chinacdc.cn/jkzt/crb/zl/szkb_11803/jszl_13141/202302/t20230201_263576.html) (Accessed at 18 Nov. 2023)
